# Supplementary material for: Enhanced Photocatalytic Performance of Visible-Light-Driven BiVO4 Nanoparticles through W and Mo Substituting
Source: MDPI journal article supplement (doi:10.3390/catal13030475), 2023-02-26
Supplement: s1 [file s1]

Archive with 1 entries (1 files):
- catalysts-2163100-supplementary.pdf
