# Supplementary material for: Enhanced Photocatalytic Performance of Visible-Light-Driven BiVO4 Nanoparticles through W and Mo Substituting
Source: MDPI journal article supplement (doi:10.3390/catal13030475), 2023-02-26
Supplement: s1 [file s1 › catalysts-2163100-supplementary.pdf]

Supplementary data

# Enhanced Photocatalytic Performance of Visible-Light-Driven BiVO<sub>4</sub> Nanoparticles through W and Mo Substituting

Chien-Yie Tsay <sup>1,\*</sup>, Ching-Yu Chung <sup>1</sup>, Chin-Yi Chen <sup>1</sup>, Yu-Cheng Chang <sup>1</sup>, Chi-Jung Chang <sup>2</sup>  
and Jerry J. Wu <sup>3</sup>

<sup>1</sup> Department of Materials Science and Engineering, Feng Chia University, Taichung 40724, Taiwan

<sup>2</sup> Department of Chemical Engineering, Feng Chia University, Taichung 40724, Taiwan

<sup>3</sup> Department of Environmental Engineering and Science, Feng Chia University, Taichung 40724, Taiwan

\* Correspondence: cytsay@fcu.edu.tw; Tel.: +886-4-2451-7250 (ext. 5312)

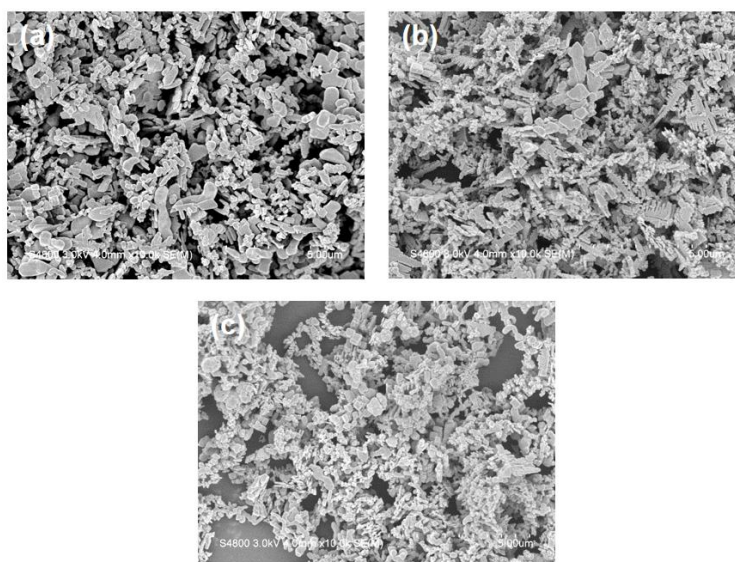

**Figure S1.** SEM micrographs of hydrothermally synthesized BiVO<sub>4</sub>-based nanoparticles. (a) undoped, (b) W-doped, and (c) Mo-doped BiVO<sub>4</sub> samples.

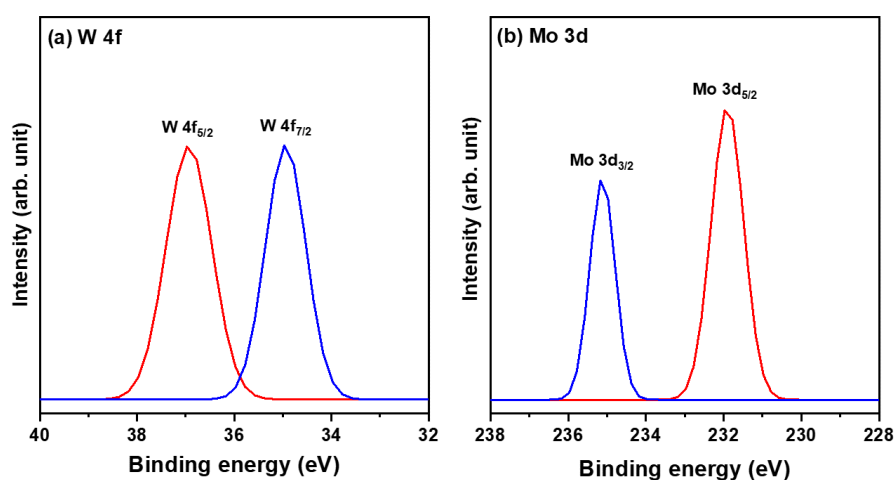

**Figure S2.** (a) W 4f and (b) Mo 3d core level spectra of hydrothermally synthesized BiVO<sub>4</sub>:W and BiVO<sub>4</sub>:Mo powder samples, respectively.
